# Supplementary material for: Young people’s choice and voice concerning sex and relationships: effects of the multicomponent Get Up Speak Out! Programme in Iganga, Uganda
Source: Springer Nature journal article supplement (doi:10.1186/s12889-022-13919-x), 2022-08-23
Supplement: MOESM1 [file 23393292]

Additional File 1

Structured questionnaire (with Lusoga translations)

| Question number | Question text                                                    | Type of question | Choices                | Hint                                                                                                                                                                                                                                                                                                                                                                                              |
|-----------------|------------------------------------------------------------------|------------------|------------------------|---------------------------------------------------------------------------------------------------------------------------------------------------------------------------------------------------------------------------------------------------------------------------------------------------------------------------------------------------------------------------------------------------|
| 0.00            | Section 0 - General information                                  |                  |                        |                                                                                                                                                                                                                                                                                                                                                                                                   |
| 0.01            | Please register the location                                     |                  |                        |                                                                                                                                                                                                                                                                                                                                                                                                   |
| 0.02            | In which sub-county are you located?/ Lino eigombolola balyetaki |                  | Nakigo<br>Namalembe    |                                                                                                                                                                                                                                                                                                                                                                                                   |
| 0.03            | In which enumeration area are you located?/ Wano beetawo wa?     | integer          |                        |                                                                                                                                                                                                                                                                                                                                                                                                   |
| 0.04            | Ask for consent to take part in the interview                    |                  | Consent<br><br>Refused | Find out the age of the prospective respondent. Please explain the objective and consequences of participation to this survey to the respondent (refer to the consent/assent form). If minor, obtain consent from the main caregiver/ guardian of the family, prior to seeking their consent. Use the consent form. The respondents should sign. If uncomfortable, verbal consent is permissible. |

Thank you for agreeing to participate! This survey will take you through different sections where we invite you share your knowledge and opinions related to sexuality and sexual & reproductive health rights, which we refer to as SRHR./ Weebale inho okwikiriza okuba omu kwaabo abegaise mu kubuliriza kuno. Okubuririza kulime ebitundu nga ebiwera. Oidha kutukobera byoidhi ni byolowooza kubigema ku byomukwaano, okwegaita, okuzaala, enkolagana ya abakazi/abawala na basadha/abalenzi, neidembe lyo kubigema kweebyo.

|      |                                                                                                                          |                 |                                                                                                                                                                                 |                                                |
|------|--------------------------------------------------------------------------------------------------------------------------|-----------------|---------------------------------------------------------------------------------------------------------------------------------------------------------------------------------|------------------------------------------------|
| 0.05 | Why did the person refuse to participate?/ Kiki ekikulobeire okwegaita mu kunonereza kuno?                               | text            |                                                                                                                                                                                 |                                                |
| 0.06 | Interviewers ID                                                                                                          | integer 1-12    |                                                                                                                                                                                 |                                                |
| 1    | Section 1 - Respondents background                                                                                       |                 |                                                                                                                                                                                 |                                                |
| 1.01 | What is your gender?/ Oliko ekikula kyo?                                                                                 | single response | Female/ muwala/mukazi<br>Male/ mulenzi/musadha                                                                                                                                  | Observe. If not sure - ask                     |
| 1.02 | Can you tell me your age (in numbers)?/ Olina emyaaka emeka?                                                             | integer         |                                                                                                                                                                                 | If don't know, ask for year and calculate age. |
| 1.03 | Do you have a national ID card or birth registration card?/ Olina endaga muntu eya Uganda or ekaadi elaga lwewazaalibwa? | single response | Yes/ yi<br>No /Mbe<br>Don't know/tidhi<br>No Answer/taizemu                                                                                                                     |                                                |
| 1.04 | What is your religion?/ Oliwaidiini ki?                                                                                  | single response | Catholics/mukatuliki<br>Protestants/ mukuristaayo<br>Born again/ mulokole<br>Other Christian groups/ abakuristaayo abandi<br>Muslim/ musilaamu<br>Other - specify/ erindi ..... |                                                |
| 1.05 | What is your ethnicity?/ Oliwaigwanga ki?                                                                                | single response | None/ azira idhini<br>Musoga<br>Other - specify/ abandi wandiika .....                                                                                                          |                                                |
| 1.06 | What is your marital status?/ Olimufumbo? Wafumbirwaku?                                                                  | single response | Single (never married)/ Tifumbirwangaku                                                                                                                                         |                                                |

|      |                                                                                                            |                   |                                                                                                                                                                                                                                                                                                                                                                                                                                          |                                                                                                                                       |
|------|------------------------------------------------------------------------------------------------------------|-------------------|------------------------------------------------------------------------------------------------------------------------------------------------------------------------------------------------------------------------------------------------------------------------------------------------------------------------------------------------------------------------------------------------------------------------------------------|---------------------------------------------------------------------------------------------------------------------------------------|
| 1.07 | If single/ divorced/ widowed (1,06) Do you have a partner?/ Olinayo mukwaano gwo?                          | single response   | Married/ mufumbo<br>Divorced/ separated/ twayawukana<br>Widowed/ Na/semwandu<br>Living together/ tubawalala aye tituli bafumbo<br>Has a boyfriend/ ninayo muganzi wange omulenzi<br>Has a girlfriend/ ninayo muganzi wange<br>Does not have a partner/ nzira muganzi                                                                                                                                                                     |                                                                                                                                       |
| 1.08 | Who do you live with?/ Oba naani?                                                                          | multiple response | Mother & Father/ maama ni baaba<br>Mother/ maama<br>Father/ baaba<br>Mother in law/ Inhazaala wange<br>Father in law/ sezaala wange<br>Grandmother / daada omukazi<br>Grandfather/ daada omusadha<br>Aunt/ ssenga<br>Uncle/ kooja<br>Sister(s)/ muganda wange omukazi<br>Brother(s)/ muganda wange omusadha<br>With husband/ wife/ omwaami oba omukwaala<br>Alone/ zzenka<br>Children/ abaana<br>Other - specify/ owundi - wandiika..... | You may mark more than 1 option                                                                                                       |
| 1.09 | What is the total size of your household?/ Muli bameka waka nga musula wano era nga muliira walala?        | integer           |                                                                                                                                                                                                                                                                                                                                                                                                                                          | This should be the total number of people who eat together/ live together as a family unit. Write down "1" if respondent lives alone. |
| 1.10 | What is the highest level of education that you obtained so far? (finished)./ Wasoma kutuuka mukibiina ki? | single response   | Primary education/ primary<br>O level/secondary                                                                                                                                                                                                                                                                                                                                                                                          | Please mark only one option                                                                                                           |

|      |                                                                                                    |                   |                                                                                                                                                                                                                                                                                                                                                                                                                                                                 |                                           |
|------|----------------------------------------------------------------------------------------------------|-------------------|-----------------------------------------------------------------------------------------------------------------------------------------------------------------------------------------------------------------------------------------------------------------------------------------------------------------------------------------------------------------------------------------------------------------------------------------------------------------|-------------------------------------------|
|      |                                                                                                    |                   | A level/higher<br>Tertiary education (institutions other than university after O/A level)/ Amasomero agemirimo ngomaze secondary oba higher<br><br>University/ universite<br>Not finished any of these levels (no formal education)/tisomangaku                                                                                                                                                                                                                 |                                           |
| 1.11 | Are you currently in school?/ Osoma?                                                               | single response   | Yes/ Yi<br>No/ mbe                                                                                                                                                                                                                                                                                                                                                                                                                                              |                                           |
| 1.12 | If yes (1,11), what is the level of education you are currently studying?/ Olimukibiina kyakumeka? | single response   | Primary education/ primary<br><br>O level/siniya, secondary<br>A level/higher<br>Tertiary education (institutions other than university after A level)/Amasomero agemirimo ngomaze secondary oba higher<br>University/ universite                                                                                                                                                                                                                               | Please mark only one option               |
| 1.13 | Have you ever dropped out of school?/Wavaaku mwisomero nga tosoma?                                 | single response   | Yes/ yi<br><br>No/ mbe                                                                                                                                                                                                                                                                                                                                                                                                                                          |                                           |
| 1.14 | If yes (1,13) What was the reason for dropping out of school?/ Kiki ekyakutoola muisomero?         | multiple response | Lack of fees/ materials/feezi oba ebyokuzesa byabula<br>Domestic/ family responsibility/ nalina okukola emirimu jawaka<br><br>Illness/ nali mulwaire<br>Parents died while still young/ abazaile baafa<br>Pregnancy/ got a child/ nafuna enda oba nazaala<br>School too far/ not accessible/ eisomero lyaali wala<br>No time/ nali nzira biseera<br>Did not like school/nali tyenda isomero<br>Got married/ nafumbirwa<br>Suspended/ expelled/bangoba kwisomero | Do not read the list, tick all that apply |

|      |                                                                                                                                     |                 |                                                                                                                                                                                                                                                                                                                                                                                                                                                                                         |                                                                                     |
|------|-------------------------------------------------------------------------------------------------------------------------------------|-----------------|-----------------------------------------------------------------------------------------------------------------------------------------------------------------------------------------------------------------------------------------------------------------------------------------------------------------------------------------------------------------------------------------------------------------------------------------------------------------------------------------|-------------------------------------------------------------------------------------|
| 1.15 | What level of education did your mother attain?/ Maama wo yakoma mukibiina ki? Yasomayo koosi?                                      | single response | <p>Feared discrimination/ stigma/ natya okusosolebwa<br/> Don't remember/tidukira<br/> No Answer/taizemu<br/> Other - specify/ ekindi .....</p> <p>No education/Tiyasomaku</p> <p>Primary education/ primary<br/> O level/siniya, secondary<br/> A level/higher<br/> Tertiary education (institutions other than university after A level)/Amasomero agemirimo ngomaze secondary oba higher<br/> University/ universite<br/> Other - specify/ekindi .....</p> <p>I don't know/tidhi</p> |                                                                                     |
| 1.16 | (If any type of education 1,15) How many years of education did she complete?/ Okutwalira awalala, mwisomero yalamamu myaaka emeka? | text            |                                                                                                                                                                                                                                                                                                                                                                                                                                                                                         | Number of years starting from primary school. IF RESPONDENT DOES NOT KNOW TYPE 'DK' |
| 1.17 | What level of education did your father attain?/ Baabawo yakoma mukibiina ki? Yasomayo koosi?                                       | single response | <p>No education/Tiyasomaku</p> <p>Primary education/ primary<br/> O level/siniya, secondary<br/> A level/higher<br/> Tertiary education (institutions other than university after A level)/Amasomero agemirimo ngomaze secondary oba higher<br/> Other - specify/ekindi .....</p> <p>I don't know/tidhi</p>                                                                                                                                                                             |                                                                                     |
| 1.18 | (If any type of education 1,17) How many years of education did he complete?/ Okutwalira awalala, mwisomero yalamamu myaaka emeka?  | text            |                                                                                                                                                                                                                                                                                                                                                                                                                                                                                         | Number of years starting from primary school. IF RESPONDENT DOES NOT KNOW TYPE 'DK' |

|      |                                                                                                                                                         |                 |                                                                                                                                                                                                                                                                                                                                                                                                                                                                                                                                             |                                                                        |
|------|---------------------------------------------------------------------------------------------------------------------------------------------------------|-----------------|---------------------------------------------------------------------------------------------------------------------------------------------------------------------------------------------------------------------------------------------------------------------------------------------------------------------------------------------------------------------------------------------------------------------------------------------------------------------------------------------------------------------------------------------|------------------------------------------------------------------------|
| 1.19 | Do you have a job/ are you involved in labour?/ Okola?<br>Okukola kotalira mu okuba omukyaala waka, okwekozesha<br>no kukola mubifo ebitali bya ofiisi. | single response | Yes/ Yi<br><br>No/ mbe                                                                                                                                                                                                                                                                                                                                                                                                                                                                                                                      | Labour includes<br>housewife, informal<br>work and self<br>employment. |
| 1.20 | If yes (1,19) What type of work do you do?/ Okola mulimu<br>ki?                                                                                         | single response | Unpaid work<br>(e.g.homemaker/housewife)/tisasulwa, ind<br>mukyaala waka.<br>Subsistence farming/nima byakulya,<br>tikusuubula<br>Informal trading/ nsubula katonotono<br>Casual, daily labour/ mpakasa leda leda<br>Contract work/ nkozesebwa ebisera ebindi<br>Self-employed/nekozesha mwene<br>Part-time permanent employment<br>salaried/Ndimukozi wamusaala aye tikola<br>lunaku oba naku donadona.<br>Full-time permanent salaried employment/<br>ndimukozi wamusaala era nkola omwezi<br>gwonogwona.<br>Other - specify/ekindi ..... | Fill in main job                                                       |
| 1.21 | Who is the primary/main income-earner in your<br>household?/ Wano waka ewaimwe, ani asinga kulabilira<br>maka mubyenfuna?                               | single response | Father/ baaba<br><br>Mother/ maama<br>Grandfather/ daada omusadha<br>Grandmother/ daada omukazi<br>Uncle/ kooja<br>Aunt/ ssenga<br>Brother(s)/ muganda wange omusadha<br>Sister(s)/ muganda wange omukazi<br>Husband/ wife/ omwaami, omukyaala<br>Myself/ nze mweene<br>Other - specify/owundi .....                                                                                                                                                                                                                                        | Select one                                                             |

|      |                                                                                                                                                                                                                                                                                                                                                                                                              |                   |                                                                                                                                                                                                                                                       |                                       |
|------|--------------------------------------------------------------------------------------------------------------------------------------------------------------------------------------------------------------------------------------------------------------------------------------------------------------------------------------------------------------------------------------------------------------|-------------------|-------------------------------------------------------------------------------------------------------------------------------------------------------------------------------------------------------------------------------------------------------|---------------------------------------|
| 1.22 | How much money (income) comes into your household each month (on average)?/ Bwogerageranya, mu mwezi, amaka gano okutwalira awalala, gaingiza sente nga imeka?                                                                                                                                                                                                                                               | text              |                                                                                                                                                                                                                                                       | IF RESPONDENT DOES NOT KNOW TYPE 'DK' |
| 2.00 | Section 2 - SRHR information and education. In this section, we wish to understand if you know of any information or education regarding sexuality and sexual & reproductive health and rights./ Mukitundu ekiiraku twenda kutegeera oba oidhi, wategezebwa oba wasomesebwaku kubigema kubyomukwaano, okwegaita, okuzaala, enkolagana ya abakazi/abawala na basadha/abalenzi, neidembe lyo kubigema kweebyo. |                   |                                                                                                                                                                                                                                                       |                                       |
| 2.01 | Have you ever received/ acquired information about sexuality or sexual and reproductive health?/ Wafunaku okutegezebwa (ebyokusoma, amawulire) kwona kwona kubyomukwaano, okwegaita, okuzaala, enkolagana ya abakazi/abawala na basadha/abalenzi, neidembe lyo kubigema kweebyo?                                                                                                                             | single response   | Yes/ Yi<br><br>No/ mbe                                                                                                                                                                                                                                |                                       |
| 2.02 | If no (2,01) Why did you never receive information about sexuality or sexual and reproductive health?/ Lwaaki tofunanga kutegezebwa ku kubyomukwaano, okwegaita, okuzaala, enkolagana ya abakazi/abawala na basadha/abalenzi, neidembe lyo kubigema kweebyo?                                                                                                                                                 | multiple response | Don't need the information/ amawulire tigetaaga<br><br>Don't know where to get it / tidhi waafuna ago amawulire<br>Too afraid to ask for information/ ntya okubisa<br>Not available/ago amawulire gazirawo<br>Other - specify / ekindi wandiika ..... | You may mark more than one option     |
| 2.03 | If yes (2,01) From whom (which person) did you receive information about sexuality or sexual and reproductive health?/ Aani eyakutegeza oba eyakuwa amawulire agagema kweebyo?                                                                                                                                                                                                                               | multiple response | Parents/ abazaile<br><br>Other family members/ abantu abandi abawaka<br>Religious leader/ abakulu abeidini<br>Health provider/ abasawo<br>Friends/emikwaano<br>Peer educator/ counsellor/ banange<br>bwetwagayaga                                     | You may mark more than one option     |

|      |                                                                                                                                      |                   |                                                                                                                                                                                                                                                                                                                               |                                                                               |
|------|--------------------------------------------------------------------------------------------------------------------------------------|-------------------|-------------------------------------------------------------------------------------------------------------------------------------------------------------------------------------------------------------------------------------------------------------------------------------------------------------------------------|-------------------------------------------------------------------------------|
|      |                                                                                                                                      |                   | <p>Youth club/ ekibiina kyabavubuka</p> <p>Teacher/omusomesa</p> <p>Traditional leader/omusawo wekinansi</p> <p>Media (TV, radio, newspaper/ magazine)/ empulizaganya nga television, radio, amawulire no butabo</p> <p>Social media and internet/ omutimbagano gwa internet neisimu</p> <p>Other - specify/ ekindi .....</p> |                                                                               |
| 2.04 | If yes (2,01) Was it easy to get this information?/ Kyaali kyangu okufuna amawulire oba okutegezebwa okwo?                           | single response   | <p>Easy/ kyangu</p> <p>Difficult/ kizibu</p> <p>Very difficult/kizibu inho</p>                                                                                                                                                                                                                                                |                                                                               |
| 2.05 | If yes (2,01) Did you find the information beneficial?/ Bwebakukobera, bwewasoma oba bwewawulira bwaakuyamba?                        | single response   | <p>Yes/ Yi</p> <p>No/ mbe</p> <p>Don't know/ tidhi</p>                                                                                                                                                                                                                                                                        |                                                                               |
| 2.06 | If no (2,05) Why was the information not beneficial?/ Lwaaki tibyakuyamba?                                                           | multiple response | <p>The information did not meet my needs / byebankobera oba byenafuna tibyanamba</p> <p>I was not comfortable / tyawulira idhembe</p> <p>Did not understand the information /bwebankobera oba amawulire gebampa tyaagategera</p> <p>Other - specify/ ekindi .....</p>                                                         | You may mark more than one option                                             |
| 2.07 | If yes (2,05) What information did you find most beneficial?/ Kubyebakukobera, bwewasoma oba bwewawulira, biki ebyasinga okukuyamba? | multiple response | <p>Where to access SRH Services/ ewokwaagana empereza denetaaga</p> <p>Different methods of Family Planning/Contraception / ebyokukozeza ebyendawulo okuziyiza okufuna enda</p> <p>HIV/ STI Testing / okwebeza siliimu</p> <p>Information regarding puberty / ebigema ku buvubuka</p>                                         | Don't read the list and mark what is said. You may mark more than one option. |



|      |                                                                                                                                                                                                                                                                                |                   |                                                                                                                                                                                                                                                                                                                                                                                                                                                                                                                              |                                   |
|------|--------------------------------------------------------------------------------------------------------------------------------------------------------------------------------------------------------------------------------------------------------------------------------|-------------------|------------------------------------------------------------------------------------------------------------------------------------------------------------------------------------------------------------------------------------------------------------------------------------------------------------------------------------------------------------------------------------------------------------------------------------------------------------------------------------------------------------------------------|-----------------------------------|
| 2.07 | If yes (2,05) Why was the information beneficial?/ Lwaaki byakuyamba?                                                                                                                                                                                                          | multiple response | <p>Information regarding sexual relationships and love/ebigema ku byokwegaita nomukwaano</p> <p>Other - specify/ ekindi .....</p> <p>The information met my needs/ I can use the information in my daily life/ amawulire genafuna ganamba okutuukiriza byenetaaga, nsobola okubikozesa bulidho.</p> <p>The information was easy to understand / amawulire gaali mangu okutegeera</p> <p>The provider made me feel comfortable/ eyali atuuwereza yanamba okuba neidembe oba emirembe</p> <p>Other - specify/ ekindi .....</p> | You may mark more than one option |
| 2.08 | (If ever been to school) Have you ever received education about sexuality or sexual and reproductive health in school?/ Wasomeebwaaku kubigema kubyomukwaano, okwegaita, okuzaala, enkolagana ya abakazi/abawala na basadha/abalenzi, neidembe lyo kubigema kweebyo mwisomero? | single response   | <p>Yes/ Yi</p> <p>No/ mbe</p>                                                                                                                                                                                                                                                                                                                                                                                                                                                                                                |                                   |
| 2.09 | If no (2,08) Why did you never receive sexuality education in school?/ Lwaaki tiwasomesebwa?                                                                                                                                                                                   | single response   | <p>My school doesn't provide it/ eisomero lyange tilibisomesa</p> <p>We have not reached the subject yet/ tukaali kubituuakaku</p> <p>Don't know/ tidhi</p> <p>Other - specify / ekindi wandiika .....</p>                                                                                                                                                                                                                                                                                                                   |                                   |
| 2.10 | If yes (2,08) Who provided the sexuality education in school?/ Ani eyakusomesa?                                                                                                                                                                                                | multiple response | <p>Teacher/omusomesa</p> <p>Friends/emikwaano</p> <p>Peer educator/ banange bwetwagayaga</p> <p>NGO/ ebibiina ebyanakyeeewa</p> <p>Health worker / omusawo</p> <p>Other - specify/ owundi - wandiika.....</p>                                                                                                                                                                                                                                                                                                                | You may mark more than one option |
| 2.11 | If yes (2,08) Did you find the sexuality education in school beneficial?/ Byebaakusomesa byakuyamba?                                                                                                                                                                           | single response   | <p>Yes/ Yi</p> <p>No/ mbe</p>                                                                                                                                                                                                                                                                                                                                                                                                                                                                                                |                                   |

|      |                                                                                                                                 |                   |                                                                                                                                                                                                                                                                                                                                                                                                                                                                                                                                   |                                                                               |
|------|---------------------------------------------------------------------------------------------------------------------------------|-------------------|-----------------------------------------------------------------------------------------------------------------------------------------------------------------------------------------------------------------------------------------------------------------------------------------------------------------------------------------------------------------------------------------------------------------------------------------------------------------------------------------------------------------------------------|-------------------------------------------------------------------------------|
| 2.12 | If no (2,11) Why was the sexuality education in school not beneficial?/ Lwaaki tibyakuyamba?                                    | single response   | <p>The information did not meet my needs/ I cannot use it in my daily life/ byebankobera oba okumpa tibyanamba, tibikozesa<br/>I was not comfortable/ tyawulira mirembe</p> <p>The person providing the education was not comfortable/ eyali alikutwegeresa yali azira idembe oba mirembe<br/>Did not understand the information /bwebankobera oba amawulire gebampa tyaagategera<br/>Other - specify/ ekindi .....</p>                                                                                                           |                                                                               |
| 2.13 | If yes (2,11) What aspects of sexuality education in school did you find most beneficial?/ Ku byebaakusomesa, biki ebwakuyamba? | text              | <p>Where to access SRH Services/awokufuna empeereza ku kubyomukwaano, okwegaita, okuzaala, enkolagana ya abakazi/abawala na basadha/abalenzi, neidembe lyo kubigema kweebyo mwisomero</p> <p>Different methods of Family Planning/Contraception/ Engeri endendawulo odokweziyiza okufuna enda<br/>HIV/ STI Testing/ okwekebeza siliimu<br/>Information regarding puberty / ebigema ku buvubuka</p> <p>Information regarding sexual relationships and love/ebigema ku byokwegaita nomukwaano<br/>Other - specify/ ekindi .....</p> | Don't read the list and mark what is said. You may mark more than one option. |
| 2.13 | If yes (2,11) Why was the sexuality education beneficial?/ Lwaaki byakuyamba?                                                   | multiple response | <p>The information met my needs/ I can use the information in my daily life/ amawulire genafuna ganamba okutuukiriza byenetaaga, nsobola okubikozesa bulidho.<br/>The information was easy to understand / amawulire gaali mangu okutegeera</p> <p>The provider made me feel comfortable/ eyali atuuwereza yanamba okuba neidembe oba emirembe<br/>Other - specify/ ekindi .....</p>                                                                                                                                              | You may mark more than one option                                             |

|      |                                                                                                                                                                                                                                                                                                                                                                                                                                       |                   |                   |                                      |                          |                                   |                                                                 |                            |                                        |                                            |                                            |                                         |
|------|---------------------------------------------------------------------------------------------------------------------------------------------------------------------------------------------------------------------------------------------------------------------------------------------------------------------------------------------------------------------------------------------------------------------------------------|-------------------|-------------------|--------------------------------------|--------------------------|-----------------------------------|-----------------------------------------------------------------|----------------------------|----------------------------------------|--------------------------------------------|--------------------------------------------|-----------------------------------------|
| 2.14 | If yes (2,01) or (2,08) When you received sexuality-related information or education, were you advised where to access sexual and reproductive health services, in case you need them?/ Bwe wasomesebwa ni bwe wategezebwa ku bigema kubyomukwaano, okwegaita, okuzaala, enkolagana ya abakazi/abawala na basadha/abalenzi, neidembe lyo kubigema kweebyo, walagirirwa yoyinza okufuna obuyambi oba ebyo kukozeza bwobanga obyetaaze? | single response   | Yes/ Yi           | No/ mbe                              | Don't remember/ tidukira | You may mark more than one option |                                                                 |                            |                                        |                                            |                                            |                                         |
| 2.15 | If yes (2,14) When you were advised where to access services, who advised you?/ Ani eyakulagirira oba eyakuwa amagezi?                                                                                                                                                                                                                                                                                                                | multiple response | Friends/emikwaano | Peer educator/ banange bwetwaagayaga | Teacher/omusomesa        | Parents/ abazaile                 | School nurse/ counsellor/ Omusawo<br>owokwisomero, abudha budha | Health worker / omusawo    | NGO/ ebibiina ebyanakyeeewa            | Mobile platform/ eisumu - whatsapp nebindi | Online/internet/ kumutimbagano gwainternet | Other - specify/ owundi - wandiika..... |
| 2.16 | From whom do you prefer to receive information and education about sexuality or sexual and reproductive health?/ Ani gwewandiyenze okukiteegeza oba okukusomesa kubigema ku byomukwaano, okwegaita, okuzaala, enkolagana ya abakazi/abawala na basadha/abalenzi, neidembe lyo kubigema kweebyo?                                                                                                                                       | multiple response | Friends/emikwaano | Peer educator/ banange bwetwaagayaga | Teacher/omusomesa        | Parents/ abazaile                 | Other family members/ abantu abandi abawaka                     | Health facility/ eidwaliro | Do not read list. Tick all that apply. |                                            |                                            |                                         |

|      |                                                                                                                                                                                                                                                                                                                                            |                   |                                                                                                                                                                                                                                                                                                                                                                                                                                                                                     |                                        |
|------|--------------------------------------------------------------------------------------------------------------------------------------------------------------------------------------------------------------------------------------------------------------------------------------------------------------------------------------------|-------------------|-------------------------------------------------------------------------------------------------------------------------------------------------------------------------------------------------------------------------------------------------------------------------------------------------------------------------------------------------------------------------------------------------------------------------------------------------------------------------------------|----------------------------------------|
| 3.00 | Section 3 - SRHR Services - access and use: In this section, we invite you to share your access and use of SRHR services. Butti, twendha otukobere kubigema ku kufuna nokukoseza ebyetagiza okukozesebwa ku bigema ku byomukwaano, okwegaita, okuzaala, enkolagana ya abakazi/abawala na basadha/abalenzi, neidembe lyo kubigema kweebyo./ | single response   | Mobile platform/ eisumu - whatsapp nebindi<br>Online/internet/ kumutimbagano gwainternet<br>Youth club/ ekibiina kyabavubuka<br>Church /mosque / amasinzizo, Kanisa oba omusikiti<br>TV/ television<br>Radio<br>Other - specify/ ewandi wandika .....                                                                                                                                                                                                                               | Do not read list. Tick all that apply. |
| 3.01 | Do you know of any place in the community which provides sexual and reproductive health services? Oidhiku awantu wona wona mukitundu kino omuntu wayinza okuwerezebwa kubigema ku byomukwaano, okwegaita, okuzaala, enkolagana ya abakazi/abawala na basadha/abalenzi, neidembe lyo kubigema kweebyo                                       | single response   | Yes/ Yi                                                                                                                                                                                                                                                                                                                                                                                                                                                                             |                                        |
| 3.02 | If yes (3.01) What services are provided at this place?/ Buwerezaki bwebalinabwo oba bwebagaba?                                                                                                                                                                                                                                            | multiple response | No/ mbe<br>Don't know/ tidhi<br>Antenatal & postnatal services/ obwitandabi ngo okaali ni nga omaze okuzaala<br>Family planning services/ okutegeka amaka nga okozesa okweziyiza okufuna enda nebindi<br>VCT/ okubudhabudha nokukeberwa siliimu<br>STI testing / okukeberegwa obulwaire obwobukaba<br>PMTCT/ okuziyiza maama obutagemya mwaana siliimu nga akaali kuzaalibwa, neera nga amaze okuzaalibwa<br>Post abortion care/ obwidandabi nga enda eviiremu oba nga etooleibwamu | Do not read list. Tick all that apply. |

|      |                                                                               |                   |                                                                                                                                                                                                                                                                                                                                                                                                                                                                                                                                                                                                                                                                                                                                                                                                                                                                                                                                                                                                                                                                                                                                                                                |                                                |
|------|-------------------------------------------------------------------------------|-------------------|--------------------------------------------------------------------------------------------------------------------------------------------------------------------------------------------------------------------------------------------------------------------------------------------------------------------------------------------------------------------------------------------------------------------------------------------------------------------------------------------------------------------------------------------------------------------------------------------------------------------------------------------------------------------------------------------------------------------------------------------------------------------------------------------------------------------------------------------------------------------------------------------------------------------------------------------------------------------------------------------------------------------------------------------------------------------------------------------------------------------------------------------------------------------------------|------------------------------------------------|
| 3.03 | How can pregnancy be prevented?/ Omuntu ayinza atya okweziyiza okufuna endha? | multiple response | <p>Life skills and sexuality counselling/ obwegerese kungeri omuntu gyasobola okubaawo obulungi nokubudhabudhibwa kubigema ku byomukwaano, okwegaita, okuzaala, enkolagana ya abakazi/abawala na basadha/abalenzi.</p> <p>Counseling for sexual violence/ okubudhabudhibwa ku kukakibwa omukwaano</p> <p>Child protection services/ Empereza kukukuuma abaana nga bali bulungi</p> <p>Hotlines/ amasimu goyinza okukubaku nga olina ekizibu</p> <p>Other - specify/ ekindi .....</p> <p>Abstinence/ obutegaita na muntu</p> <p>Male condom/ akapiira ka galimpitawa aka basadha</p> <p>Female condom/ akapiira ka galimpitawa akabakazi</p> <p>Contraceptive pill/ amakerenda agaziyiza okufuna enda</p> <p>Injections/ empiso</p> <p>Implant/ akakerenda kebata mumubiri</p> <p>IUD/ akawera kebata munda mubukyaala</p> <p>Sterilization/ okukomya okuzaala</p> <p>Morning after pill/ emergency pill/ Eikerenda omukazi lyamira nga yakamala okuba nomusadha</p> <p>Withdrawal/okumalira kiliya</p> <p>Observing safe days/ okubala enaaku notegeera enaku dotasobola kufuna nda</p> <p>Don't know/ tidhi</p> <p>No Answer/taizemu</p> <p>Other - specify/ ekindi .....</p> | Do not read the list, tick which ones are said |
|------|-------------------------------------------------------------------------------|-------------------|--------------------------------------------------------------------------------------------------------------------------------------------------------------------------------------------------------------------------------------------------------------------------------------------------------------------------------------------------------------------------------------------------------------------------------------------------------------------------------------------------------------------------------------------------------------------------------------------------------------------------------------------------------------------------------------------------------------------------------------------------------------------------------------------------------------------------------------------------------------------------------------------------------------------------------------------------------------------------------------------------------------------------------------------------------------------------------------------------------------------------------------------------------------------------------|------------------------------------------------|

|      |                                                                                                               |                   |                                                                                                                                                                                                                                                                                                                                                                                                                                                                                                                                                                                                                                                                                                                                                                                                                              |                                                |
|------|---------------------------------------------------------------------------------------------------------------|-------------------|------------------------------------------------------------------------------------------------------------------------------------------------------------------------------------------------------------------------------------------------------------------------------------------------------------------------------------------------------------------------------------------------------------------------------------------------------------------------------------------------------------------------------------------------------------------------------------------------------------------------------------------------------------------------------------------------------------------------------------------------------------------------------------------------------------------------------|------------------------------------------------|
| 3.04 | Whose responsibility is it to prevent pregnancy?/ Aani avunaanizibwa okubona nti omuwala/omukazi tavuna ndha? | single response   | Boy / man/ mulenzi, musadha<br><br>Girl/ woman/ muwala, mukazi<br>Both/ bombi                                                                                                                                                                                                                                                                                                                                                                                                                                                                                                                                                                                                                                                                                                                                                |                                                |
| 3.05 | Have you ever engaged in sexual intercourse?/ Wegaitaku no muntu yena yena?                                   |                   | Yes/ Yi<br><br>No/ mbe                                                                                                                                                                                                                                                                                                                                                                                                                                                                                                                                                                                                                                                                                                                                                                                                       |                                                |
| 3.06 | If yes (3,05), at age did you start having sexual intercourse?/ Olwasooka, walinemyaaka emeka?                | integer           |                                                                                                                                                                                                                                                                                                                                                                                                                                                                                                                                                                                                                                                                                                                                                                                                                              |                                                |
| 3.07 | Do you currently use any contraception?/ Eriyo kyokozesa okweziyiza okufuna enda?                             | single response   | Yes/ Yi<br><br>No/ mbe                                                                                                                                                                                                                                                                                                                                                                                                                                                                                                                                                                                                                                                                                                                                                                                                       |                                                |
| 3.08 | If no (3,07) Why do you not use any contraception?/ Lwaaki?                                                   | multiple response | Never thought about it/ tikilowoozangaku<br><br>My spouse/ partner/ boyfriend/ girlfriend disapproves/ munange taikiriza<br><br>I am worried about the side-effects/ nerarikira obulabe obubirimu<br><br>I want (more) children/ nenda kuzaala baana<br><br>I don't agree with contraception/ tiikiriza mu kweziyiza kufuna nda<br><br>It makes me uncomfortable during sex/ bimbuza emirembe bwembanga negaita<br><br>I did not manage to ask/ negotiate the use of a contraceptive with my partner/ tyasobola kusaba oba okwikirizaganya nimunange kubyokweziyiza okufuna enda<br><br>It reduces sexual satisfaction/ desire/ kukendeeza okumatizibwa mukwegaita<br><br>I did not know about contraceptives/ ebyokweziyiza okufuna enda tyabumanaaku<br><br>No method available at the time/nzira kyensobola kukozeza buti | Do not read the list, tick which ones are said |

|      |                                                                                                                                                                        |                   |                                                                                                                                                                                                                                                                                                                                                                                                                                                                                                                                                                                                                                                        |                                                |
|------|------------------------------------------------------------------------------------------------------------------------------------------------------------------------|-------------------|--------------------------------------------------------------------------------------------------------------------------------------------------------------------------------------------------------------------------------------------------------------------------------------------------------------------------------------------------------------------------------------------------------------------------------------------------------------------------------------------------------------------------------------------------------------------------------------------------------------------------------------------------------|------------------------------------------------|
| 3.09 | If no (3,07) So you do not use contraception, but would you liked to use it now?/ To kosesa kintu kyona kyona kweziyiza kufuna ndha; aye wandiyenze okufuna kyokozesa? | single response   | <p>I do not know where to go to get contraceptives/ tiidi waakufuna ebiziyiza kufuna nda</p> <p>Not sexually active/ nzira musadha, tyegaita</p> <p>Refused to obtain contraceptives by health care provider(s)/ Abasawo baaloba okumpa ebiziyiza kufuna nda</p> <p>Other - specify/ ekindi .....</p> <p>Yes/ Yi</p>                                                                                                                                                                                                                                                                                                                                   | Do not read the list, tick which ones are said |
| 3.10 | If yes (3,07) What method of contraception do you use?/ Kiki kyewandiyenze okukozesa?                                                                                  | multiple response | <p>No/ mbe</p> <p>Abstinence/ obutegaita na muntu</p> <p>Male condom/ akapiira ka galimpitawa aka basadha</p> <p>Female condom/ akapiira ka galimpitawa akabakazi</p> <p>Contraceptive pill/ amakerenda agaziyiza okufuna enda</p> <p>Injections/ empiso</p> <p>Implant/ akakerenda kebata mumubiri</p> <p>IUD/ akawera kebata munda mubukyaala</p> <p>Sterilization/ okukomya okuzaala</p> <p>Morning after pill/ emergency pill/ Eikerenda omukazi lyamira nga yakamala okuba nomusadha</p> <p>Withdrawal/okumalira kiliya</p> <p>Observing safe days/ okubala enaaku notegeera enaku dotasobola kufuna nda</p> <p>Other - specify/ ekindi .....</p> | Do not read the list, tick which ones are said |
| 3.11 | If yes (3,07) Who provided you the contaceptive method?/ Aani eyakuwa oba wabitoolawa?                                                                                 | multiple response | <p>Peer educator/ banange bwetwagaya</p> <p>Health facility, medical staff/ eidwaliro oba abasawo</p> <p>School/ kuisomero</p>                                                                                                                                                                                                                                                                                                                                                                                                                                                                                                                         | You may mark more than one option              |

|      |                                                                                                                                                                                                                                                    |                   |                                                                                                                                                                                                                                                                                                                                                                                   |                                   |
|------|----------------------------------------------------------------------------------------------------------------------------------------------------------------------------------------------------------------------------------------------------|-------------------|-----------------------------------------------------------------------------------------------------------------------------------------------------------------------------------------------------------------------------------------------------------------------------------------------------------------------------------------------------------------------------------|-----------------------------------|
|      |                                                                                                                                                                                                                                                    |                   | Youth club/ ekibiina kyabavubuka<br>Community health worker/ abasawo abakola, abatambula mukitundu<br>Outreach services (open day/ routine services)/ abantu abaidha okuwereeza mukitundu<br>Pharmacies/ shops/ amaduuka agatunda obulezi<br>Other/ owundi .....                                                                                                                  |                                   |
| 3.12 | (For female) Have you ever been pregnant?/ Wafunaku endha?                                                                                                                                                                                         | single response   | Yes/ Yi<br>No/ mbe                                                                                                                                                                                                                                                                                                                                                                |                                   |
| 3.13 | If yes (3,12) Was it your choice to become pregnant?/ Niwe eyesalawo nti ogifune? Wali ogyendha?                                                                                                                                                   | single response   | Yes/ Yi<br>No/ mbe                                                                                                                                                                                                                                                                                                                                                                |                                   |
| 3.14 | If yes (3,12) How old were you at your first pregnancy? Kweeyo endha eyasooka, walina emyaaka emeka?/                                                                                                                                              | integer           |                                                                                                                                                                                                                                                                                                                                                                                   |                                   |
| 3.15 | How many children do you have? Olina abaana bameka?                                                                                                                                                                                                | integer           |                                                                                                                                                                                                                                                                                                                                                                                   | If no children, write 0           |
| 3.16 | If children (3,15) (For male) At what age did you become a father?/ Wafuuka baaba nga olina emyaaka emeka?                                                                                                                                         | integer           |                                                                                                                                                                                                                                                                                                                                                                                   |                                   |
| 3.17 | If children (3,15) Did you want to become a father at this time? (For male)./ Olwo olwasooka, wali oyenda okufuuka baaba?                                                                                                                          | single response   | Yes/ Yi<br>No/ mbe                                                                                                                                                                                                                                                                                                                                                                |                                   |
| 3.18 | Which of the following services have you used?/ Waliwo empereza oba oyambibwa okuwera kubigema ku byomukwaano, okwegaita, okuzaala, enkolagana ya abakazi/abawala na basadha/abalenzi, neidembe lyo kubigema kweebyo. Nkobera oba wakozezaku bino: | multiple response | Antenatal & postnatal services/ obwitandabi ngo okaali ni nga omaze okuzaala<br><br>Family planning services/ okutegeka amaka nga okozesa okweziyiza okufuna enda nebindi<br><br>VCT/ okubudhabudha nokukeberwa siliimu<br>STI testing / okukeberegwa obulwaire obwobukaba<br>PMTCT/ okuziyiza maama obutagemya mwaana siliimu nga akaali kuzaalibwa, neera nga amaze okuzaalibwa | Read all and tick which ones used |



|      |                                                                                                                |                   |                                                                                                                                                                                                                                                                                                                                                                                                                                                                                                                                                                                                        |                                   |
|------|----------------------------------------------------------------------------------------------------------------|-------------------|--------------------------------------------------------------------------------------------------------------------------------------------------------------------------------------------------------------------------------------------------------------------------------------------------------------------------------------------------------------------------------------------------------------------------------------------------------------------------------------------------------------------------------------------------------------------------------------------------------|-----------------------------------|
|      |                                                                                                                |                   | <p>(Post) abortion care/obwidandabi nga enda eviiremu oba nga etooleibwamu</p> <p>Life skills and sexuality counselling/ obwegerese kungeri omuntu gyasobola okubaawo obulungi nokubudhabudhibwa kubigema ku byomukwaano, okwegaita, okuzaala, enkolagana ya abakazi/abawala na basadha/abalenzi.<br/>Child protection services/ Empereza kukukuuma abaana nga bali bulungi</p> <p>Hotlines/ amasimu goyinza okukubaku nga olina ekizibu<br/>Counseling for sexual violence/ okubudhabudhibwa ku kukakibwa omukwaano</p> <p>Haven't used any service/ ezira kyenakozesaaku</p>                         |                                   |
| 3.19 | If not used any service (3,18) Why havent you used any of the services?/ Lwaaki? tobikozesangaku?              | multiple response | <p>I don't know about any such services/ ezira mpereza gyendidi<br/>I never had the need to go/ tityetaagangaku</p> <p>My parents disapprove/ abazaile tibandikiriza<br/>My spouse/ partner/ boyfriend/ girlfriend disapproves/ munange taikiriza</p> <p>I am afraid to be scolded at the health facility/ tya nti kwiidwaliro baida kunvuma</p> <p>It costs too much / sente ningiinho<br/>Its too far away/ wala inho<br/>I am shy/ ninensoni<br/>Not available in my community/ byo mukitundu kyaife biziramu</p> <p>Never thought about it/ tikirowoozangaku<br/>Other - specify/ ekindi .....</p> | You may mark more than one option |
| 3.20 | If you have used these services (3,18), who provided them?/ Okuwerezebwa kuno wakwaagana wa? Ani eyakuweereza? | multiple response | Peer educator / banange bwetwaagayaga                                                                                                                                                                                                                                                                                                                                                                                                                                                                                                                                                                  | You may mark more than one option |

|      |                                                                                                                                                                                                                                                                                            |                 |                                                                                                                                                                                                                                                                                                                                                                                                              |                                     |
|------|--------------------------------------------------------------------------------------------------------------------------------------------------------------------------------------------------------------------------------------------------------------------------------------------|-----------------|--------------------------------------------------------------------------------------------------------------------------------------------------------------------------------------------------------------------------------------------------------------------------------------------------------------------------------------------------------------------------------------------------------------|-------------------------------------|
|      |                                                                                                                                                                                                                                                                                            |                 | Health facility, medical staff/ eidwaliro oba abasawo<br>School/ kuisomero<br>Youth club/ ekibiina kyabavubuka<br>Community health worker/ abasawo abakola, abatambula mukitundu<br>Outreach services (open day/ routine services)/ abantu abaidha okuwereeza mukitundu<br><br>Pharmacies/ shops/ amaduuka agatunda obulezi<br>Private clinic/ amadwaliro agaabantu<br>Other - specify/ ewandi wandika ..... |                                     |
| 3.21 | If yes to VCT/STI testing/ PMCTC (3,18) Have you had an STI in the last 12 months?/ Walwaalaku obulwaire obugema kukwegaita (obwabukaba) mu mweezi 12 egibise?                                                                                                                             | single response | Yes/ Yi                                                                                                                                                                                                                                                                                                                                                                                                      |                                     |
| 3.24 | The last time you used any of these services (3,18) How did you find the quality? Please rate on a scale of 1 -5 with 1 as lowest quality support and 5 as highest quality. Lwewasemba okukoseza kumpereza edho, empereza yene yali etya?/ Bwetuba tugaba makisi, kwitaanu obawaaku imeka? | single response | No/ mbe<br>Very low/ bad quality/ mbi inho                                                                                                                                                                                                                                                                                                                                                                   |                                     |
| 3.25 | The last time you used SRHR services or contraception (3,07 or 3,18), did someone refer you to go there?/ Lwewasemba okukoseza kumpereza edho, eriyo ayakukoba okujaayo?                                                                                                                   | single response | Low/ bad quality/ mbi<br>Average quality/ eri wagati awo<br>Good quality/ nungi<br>Excellent quality/ nungi inho, mbitirivu<br>Yes/ Yi                                                                                                                                                                                                                                                                       |                                     |
| 3.26 | If yes (3,25) Who referred you?/ aani ayakukoba okujaayo?                                                                                                                                                                                                                                  | single response | No/ mbe<br>Don't remember/ tidukira<br>Friends/emikwaano<br>Peer educator/ banange bwetwagaya<br>Teacher/ abasomesa                                                                                                                                                                                                                                                                                          | Do not read, tick which one is said |

|      |                                                                                                                                                                                                             |                          |                                                                                                                                                                                                                                                                                          |
|------|-------------------------------------------------------------------------------------------------------------------------------------------------------------------------------------------------------------|--------------------------|------------------------------------------------------------------------------------------------------------------------------------------------------------------------------------------------------------------------------------------------------------------------------------------|
|      |                                                                                                                                                                                                             |                          | Parents/ abazaile<br>School nurse/ counsellor/ Omusawo<br>owokwisomero, abudha budha<br><br>Health worker/ omusawo<br>NGO/ ebibiina ebyanakyeeewa<br>Mobile platform/ eisumu - whatsapp nebindi<br>Online/internet/ kumutimbagano gwainternet<br>Other - specify/ owundi - wandiika..... |
| 3.27 | In the last 12 months, have you been denied health services?/ Mumyeezi eikumi nebiri egibise, wajaaku mwidwaaliro oba awaidandbibwa awandi walooba kuyambibwa?                                              | single response          | Yes/ Yi                                                                                                                                                                                                                                                                                  |
| 3.28 | If yes (3,27) Why were you denied health services?/ Nsongaki jebaawa?                                                                                                                                       | single response          | No/ mbe<br>I was found too young/ nali muto inho<br><br>I was told single/ unmarried persons cannot access/ bankoba nti abatali bafumbo tibabawa byakweziyiza kufuna nda<br>I did not have enough money/ tyalinasente dimala<br>Other - specify/ ekindi .....                            |
| 3.29 | If yes (3,05) Have you used condoms in the past 12 months?/ Wakozezaaku akapiira ka galimpitawa oba condom mu myeezi 12 egibise?                                                                            | single response          | Yes/ Yi<br><br>No/ mbe                                                                                                                                                                                                                                                                   |
| 3.30 | If yes (3,05) I would like to ask you about your recent sexual activity. When was the last time you had sexual intercourse?/ Nendha kubuuza ku bigema ku lwewasembayo okwegaita; li lwewasembayo okwegaita? | integer, single response | Days/ enaku:<br><br>Weeks/wiki:<br>Months/emyeezi:<br>Years/emyaaka:                                                                                                                                                                                                                     |
| 3.31 | If yes (3,05) The last time you had sexual intercourse with this person, was a condom used?/ Lwewasembayo okwegaita, mwakozeza akapiira kagalimpitawa oba condom?                                           | single response          | Yes/ Yi                                                                                                                                                                                                                                                                                  |

|      |                                                                                                                                                                                                                                                                                                                                     | No/ mbe         |                                                                                                                                                                               |                                       |
|------|-------------------------------------------------------------------------------------------------------------------------------------------------------------------------------------------------------------------------------------------------------------------------------------------------------------------------------------|-----------------|-------------------------------------------------------------------------------------------------------------------------------------------------------------------------------|---------------------------------------|
|      | Section 4 - Personal attitudes and opinions on contraception: In this section, we wish to follow up with your personal attitudes and opinions regarding SRHR. Mukitundu kino twenda okutegeera ku bwolowoza ku byomukwaano, okwegaita, okuzaala, enkolagana ya abakazi/abawala na basadha/abalenzi, neidembe lyo kubigema kweebyo./ |                 |                                                                                                                                                                               |                                       |
| 4.00 | Do you agree with the following statements:/ oidha kunkobera oba toikirikiza irara, toikiriza, oliwagati awo (okiriza toikiriza), oikiriza, oba oikirikiza irara. Kwebyo olondaku kirala.                                                                                                                                           |                 | 1= strongly disagree/tikirikiza irara   2= disagree/ tikiriza   3=neutral/ ndi wagati awo   4= agree/ ndikiriza   5= strongly agree/ ndikirikiza irara   DK= don't know/ tidi |                                       |
| 4.01 | I find it appropriate for a boy to propose to use a condom./ Nze mbona nti kisaanira omulenzi of kukoba omuwala nti bakozeze akapiira oba condom                                                                                                                                                                                    | single response |                                                                                                                                                                               |                                       |
| 4.02 | I find it appropriate for a girl to propose to use a condom./ Nze mbona nti kisaanira omuwala okukoba omuwala nti bakozeze akapiira oba condom                                                                                                                                                                                      | single response |                                                                                                                                                                               |                                       |
| 4.03 | I feel confident that I can use a condom every time if I have sexual intercourse in the future./ Nze nsobola okukozesa akapiira oba condom buli bwenaaba nga negaita nomuntu mumaiso oba yebwida.                                                                                                                                   | single response |                                                                                                                                                                               |                                       |
| 4.04 | I am worried about being denied access to SRH services./ Nerarikirira nti bayinza obutampereza oba obutampa bwenendha kumpereza edigema ku byomukwaano, okwegaita, okuzaala, enkolagana ya abakazi/abawala na basadha/abalenzi, neidembe lyo kubigema kweebyo.                                                                      | single response |                                                                                                                                                                               |                                       |
| 4.05 | I am worried about becoming/making someone pregnant early/. Nerarikirira nti ninza okufuna enda nga nkaali kutuusa kiseera/ okunisa omuwala/omukazi enda nga akaali kutuusa kiseera.                                                                                                                                                | single response |                                                                                                                                                                               |                                       |
| 4.06 | It is difficult to access contraceptives for me./ Kinzibuwalira okufuna ebyokukozesa okweziyiza okufuna enda.                                                                                                                                                                                                                       | single response |                                                                                                                                                                               |                                       |
| 4.07 | When can a person access a 'modern' form of contraception? (Any form of contraception except natural family planning)/ Mbeeraki oba kiseera ki ekisanira omuntu okufuna oba okukozesa ebigema oba okuziyiza okufuna endha?                                                                                                          | single response | Always/ ekiseera kyona kyona nga ayenze<br><br>Never/ wazira naire, talina kufuna<br>Only once married/ nga mufumbo                                                           | Read the list, tick which one is said |

|                                                                                                                                                                                                                                                                                                                                                                                                                                                                                                                                                                                                                                                                                                                                                                                                                                                                    |                                                                                                                                                |                   |                                                                                                                                                                                                                                                                                                                                                                                                                                                                                                                                               |                                                       |
|--------------------------------------------------------------------------------------------------------------------------------------------------------------------------------------------------------------------------------------------------------------------------------------------------------------------------------------------------------------------------------------------------------------------------------------------------------------------------------------------------------------------------------------------------------------------------------------------------------------------------------------------------------------------------------------------------------------------------------------------------------------------------------------------------------------------------------------------------------------------|------------------------------------------------------------------------------------------------------------------------------------------------|-------------------|-----------------------------------------------------------------------------------------------------------------------------------------------------------------------------------------------------------------------------------------------------------------------------------------------------------------------------------------------------------------------------------------------------------------------------------------------------------------------------------------------------------------------------------------------|-------------------------------------------------------|
| 4.08                                                                                                                                                                                                                                                                                                                                                                                                                                                                                                                                                                                                                                                                                                                                                                                                                                                               | <p>If a girl becomes pregnant here, whom can she turn to?/<br/>Mukitundu kino, omuwala bwafuna endha, ani gwayinza okutukirira okumuyamba?</p> | multiple response | <p>Only after having children/ ngamaze okuzaala abaana<br/>At the age of puberty/ nga muvubuka<br/>Other - specify/ ekindi .....</p> <p>Parents/ abazaile</p> <p>Other family members/ abawaka abandi<br/>Health worker/ omusawo<br/>Teacher/ abasomesa<br/>Traditional leader/ omusawo owekinansi<br/>Religious leader/ abakulu abeidini<br/>Peer educator/ banange bwetwagaya<br/>Partner/boy/girlfriend/ bunange, muganziwe<br/>Friends/emikwaano<br/>Nobody/ wazira<br/>Don't know/ tidhi<br/>Other - specify/ owundi - wandiika.....</p> | <p>Do not read the list, tick which ones are said</p> |
| <p>Section 5 - Support : In this section, we wish to know about the support that you receive on SRHR issues from those around you. Mukitundu kino, twenda kutegeera okuyambibwa kwofuna okuva kubantu abakwetolweire ku bigema ku bwolowoza ku byomukwaano, okwegaita, okuzaala, enkolagana ya abakazi/abawala na basadha/abalenzi, neidembe lyo kubigema kweebyo</p> <p>How easy do you find it to talk to the following people about sexuality, contraception and relationships? Please rate on a scale of 1-5 how easy it is. 1 being the most difficult and 5 being the easiest./</p> <p>Kikwanguyira kitya okwogera nabantu bano ku bigema ku byomukwaano, okwegaita, okweziyiza okufuna endha, okuzaala, enkolagana ya abakazi/abawala na basadha/abalenzi, neidembe lyo kubigema kweebyo? Kizibu inho, kizibu, kiri wagati awo, kyangu oba kyangu inho?</p> |                                                                                                                                                |                   | <p>Rate<br/>1= very difficult/   2=difficult   3=neutral   4=easy   5=very easy<br/>1. Kizibu inho 2. kizibu 3.kiri wagati awo 4.kyangu 5. kyangu inho</p>                                                                                                                                                                                                                                                                                                                                                                                    |                                                       |
| 5.02                                                                                                                                                                                                                                                                                                                                                                                                                                                                                                                                                                                                                                                                                                                                                                                                                                                               | Teachers./ Abasomesa                                                                                                                           | single response   |                                                                                                                                                                                                                                                                                                                                                                                                                                                                                                                                               |                                                       |
| 5.03                                                                                                                                                                                                                                                                                                                                                                                                                                                                                                                                                                                                                                                                                                                                                                                                                                                               | Peers./ Baino, mikwaanogyo byemwaaga                                                                                                           | single response   |                                                                                                                                                                                                                                                                                                                                                                                                                                                                                                                                               |                                                       |

|      |                                                                                                                                                                                                                                                                                                                                                                                                                                                                                                                                                                                                           |                 |                                                                                                                                                                                                                                 |
|------|-----------------------------------------------------------------------------------------------------------------------------------------------------------------------------------------------------------------------------------------------------------------------------------------------------------------------------------------------------------------------------------------------------------------------------------------------------------------------------------------------------------------------------------------------------------------------------------------------------------|-----------------|---------------------------------------------------------------------------------------------------------------------------------------------------------------------------------------------------------------------------------|
| 5.04 | Parents. / Abazaire                                                                                                                                                                                                                                                                                                                                                                                                                                                                                                                                                                                       | single response |                                                                                                                                                                                                                                 |
| 5.05 | Other family members./ Abantu abandi abawaka nga bagandabo naabolungada                                                                                                                                                                                                                                                                                                                                                                                                                                                                                                                                   | single response |                                                                                                                                                                                                                                 |
| 5.06 | Girlfriend/ boyfriend / spouse/ partner./ Muganziwo, omwaami oba omukyaalawo                                                                                                                                                                                                                                                                                                                                                                                                                                                                                                                              | single response |                                                                                                                                                                                                                                 |
| 5.07 | Traditional or community chiefs./ Abakulu abobuwangwa aboomukitundu.                                                                                                                                                                                                                                                                                                                                                                                                                                                                                                                                      | single response |                                                                                                                                                                                                                                 |
| 5.08 | (Local) political leader./ Ba LC - abakulu abalonde<br><br>Do you feel the following people understand you when discussing these topics? Please rate on a scale of 1-5 the level of understanding. 1 being the least understanding and 5 being the most understanding./ Olowooza abantu bano bakutegeera bwooba oyogera ku byomukwaano, okwegaita, okweziyiza okufuna endha, okuzaala, enkolagana ya abakazi/abawala na basadha/abalenzi, neidembe lyo kubigema kweebyo? Tibakutegerera irara, kizibu okukutegeera, kiri wagati awo, bakutegeera muku, bakutegeerera irara?                               | single response | Rate<br>1= not understanding at all   2=not so understanding   3=neutral   4=understanding   5=very understanding 1.Tibakutegerera irara, 2. kizibu okukutegeera, 3. kiri wagati awo 4. bakutegeera muku 5. bakutegeerera irara |
| 5.09 | Teachers./ Abasomesa                                                                                                                                                                                                                                                                                                                                                                                                                                                                                                                                                                                      | single response |                                                                                                                                                                                                                                 |
| 5.10 | Peers./ Baino, mikwaanogyo byemwaaga                                                                                                                                                                                                                                                                                                                                                                                                                                                                                                                                                                      | single response |                                                                                                                                                                                                                                 |
| 5.11 | Parents./ Abazaire                                                                                                                                                                                                                                                                                                                                                                                                                                                                                                                                                                                        | single response |                                                                                                                                                                                                                                 |
| 5.12 | Other family members./ Abantu abandi abawaka nga bagandabo naabolungada                                                                                                                                                                                                                                                                                                                                                                                                                                                                                                                                   | single response |                                                                                                                                                                                                                                 |
| 5.13 | Girlfriend/ boyfriend / spouse/ partner./ Muganziwo, omwaami oba omukyaalawo                                                                                                                                                                                                                                                                                                                                                                                                                                                                                                                              | single response |                                                                                                                                                                                                                                 |
| 5.14 | Traditional or community chiefs./ Abakulu abobuwangwa aboomukitundu.                                                                                                                                                                                                                                                                                                                                                                                                                                                                                                                                      | single response |                                                                                                                                                                                                                                 |
| 5.15 | (Local) political leader./ Ba LC - abakulu abalonde<br><br>Do you feel supported by the following people in accessing sexuality education and SRH services? Please rate on a scale of 1 to 5. 1 being the least supportive and 5 being the most supportive./ Owulira nti abantu bano bakuyamba oba okuwagira okusomesebwa and kuwerezebwa ku byomukwaano, okwegaita, okweziyiza okufuna endha, okuzaala, enkolagana ya abakazi/abawala na basadha/abalenzi, neidembe lyo kubigema kweebyo?tibakuyamba obakuwagira naire, kizibu okuyamba oba okuwagira, wagati awo, bagezaaku, Bayamba era bawagira inho? | single response | Rate<br>1= very unsupportive   2=not so supportive  3=neutral   4=supportive  5=very supportive 1. tibakuyamba obakuwagira naire 2.kizibu okuyamba oba okuwagira 3. wagati awo 4.bagezaaku 5.Bayamba era bawagira inho          |

|                                                                                                                                                                                            |                                                                                                                                                                                                                                                               |                 |                                                                                                                                                                                                                                                                                                                                                                                                        |                             |
|--------------------------------------------------------------------------------------------------------------------------------------------------------------------------------------------|---------------------------------------------------------------------------------------------------------------------------------------------------------------------------------------------------------------------------------------------------------------|-----------------|--------------------------------------------------------------------------------------------------------------------------------------------------------------------------------------------------------------------------------------------------------------------------------------------------------------------------------------------------------------------------------------------------------|-----------------------------|
| 5.17                                                                                                                                                                                       | Teachers./ Abasomesa                                                                                                                                                                                                                                          | single response |                                                                                                                                                                                                                                                                                                                                                                                                        |                             |
| 5.18                                                                                                                                                                                       | Peers./ Baino, mikwaanogyo byemwaaga                                                                                                                                                                                                                          | single response |                                                                                                                                                                                                                                                                                                                                                                                                        |                             |
| 5.19                                                                                                                                                                                       | Parents./ Abazaire                                                                                                                                                                                                                                            | single response |                                                                                                                                                                                                                                                                                                                                                                                                        |                             |
| 5.20                                                                                                                                                                                       | Other family members./ Abantu abandi abawaka nga bagandabo naabolungada                                                                                                                                                                                       | single response |                                                                                                                                                                                                                                                                                                                                                                                                        |                             |
| 5.21                                                                                                                                                                                       | Girlfriend/ boyfriend / spouse/ partner./ Muganziwo, omwaami oba omukyaalawo                                                                                                                                                                                  | single response |                                                                                                                                                                                                                                                                                                                                                                                                        |                             |
| 5.22                                                                                                                                                                                       | Traditional or community chiefs./ Abakulu abobuwangwa aboomukitundu.                                                                                                                                                                                          | single response |                                                                                                                                                                                                                                                                                                                                                                                                        |                             |
| 5.23                                                                                                                                                                                       | (Local) political leader./ Ba LC - abakulu abalonde                                                                                                                                                                                                           | single response |                                                                                                                                                                                                                                                                                                                                                                                                        |                             |
| 5.25                                                                                                                                                                                       | In general, do you have someone at home with whom you can talk to about your feelings/hopes/worries most of the time?/ Okutwaalira awalala, olinayo omuntu eka gwasobola okwogeraku naye ku bwowulira, byosuubira, ebikwerarikiriza ebiseera ebisinga obungi? | single response | Yes/ Yi<br><br>No/ mbe<br>Don't know/ tidhi                                                                                                                                                                                                                                                                                                                                                            |                             |
| 5.26                                                                                                                                                                                       | If yes (5,25) Who is that person?/ Naani?                                                                                                                                                                                                                     | single response | Mother/ maama<br><br>Father/ baaba<br><br>Sister/ mugandawange omuwala<br>Brother/ mugandawange omulenzi<br>Cousin/ mugandawange ku maama,baama omuto oba mwaana wa seenga oba kojja<br><br>Grandfather/ daada omusadha<br>Grandmother/ daada omukazi<br>Husband/ omwaami<br>Wife/omukyaala<br>Aunt/ ssenga oba maama omuto<br>Uncle/ kojja oba baaba omuto<br>Other - specify/ owundi - wandiika..... | Please tick only one option |
| <p>Section 6 - Violence: In this section, we invite you to share if you have experiences any violence. Mukitundu kino twendha otukobere ku byobaire obitamu kungeri yokubisibwa obubi.</p> |                                                                                                                                                                                                                                                               |                 |                                                                                                                                                                                                                                                                                                                                                                                                        |                             |

|      |                                                                                                                                                                                                                                                                       |                   |                                                                                                                                                                                                                                                                     |                                          |
|------|-----------------------------------------------------------------------------------------------------------------------------------------------------------------------------------------------------------------------------------------------------------------------|-------------------|---------------------------------------------------------------------------------------------------------------------------------------------------------------------------------------------------------------------------------------------------------------------|------------------------------------------|
| 6.01 | How often have you been physically hurt/hit by a member of the opposite sex?/ Mulundi emeka nga okubibwa omunt atali wakikula kyo (omusadha/mulenzi oba omukazi/muwala)? Ebiseera byona byona, ebiseera ebisinga, ebiseera ebindi, kirwaawo okubaawo oba tikibangawo? | single response   | All the time/ bulikiseera<br><br>Frequently/ ebiseera ebisinga obungi, emirundi mingi<br>Sometimes/ ebiseera ebindi<br>Rarely/ lulala na lulala<br>Never/ tibankubangaku<br>I don't wish to share this/ tyenda kukyogeraku                                          | Read the list, tick one                  |
| 6.02 | How often do you experience sexual harassment?/ Mulundi emeka nga abantu bakola ebintu ebiraga nti benda kukukabasanya? Ebiseera byona byona, ebiseera ebisinga, ebiseera ebindi, kirwaawo okubaawo oba tikibangawo?                                                  | single response   | Everyday/ bulilunaku<br><br>Once or twice a week/ mulundi mulala mu wiki<br>Once or twice a month/ mulundi mulala mumweezi<br>Less than once a month/ tikiweza mulundi mulala mu mweezi<br>Never/ tikintuukangaku<br>I don't wish to share this/ tyenda kukyogeraku | Read the list, tick one                  |
| 6.03 | Have you ever been physically forced to perform any sexual acts you did not want to?/ Wakakibwaku omukwaano/okwegaita no muntu oba okukola bintu ebyefananiza no kwegaita nga toyenda?                                                                                | single response   | Yes/ Yi<br><br>No/ mbe<br>No answer/ taizeemu                                                                                                                                                                                                                       |                                          |
| 6.04 | If yes (6,03) Did you turn to someone in case of sexual assault, harassment or force?/ Wa loopa oba wakoberaku omuntu yena yena?                                                                                                                                      | single response   | Yes/ Yi<br><br>No/ mbe<br>No answer/ taizeemu                                                                                                                                                                                                                       |                                          |
| 6.05 | If yes (6,03) Who did you turn to?/ Aani gwe wa loopera oba gwewakobera?                                                                                                                                                                                              | multiple response | Parents/ abazaile<br><br>Other family members/ abawaka abandi                                                                                                                                                                                                       | Do not read the list, tick the ones said |



Religious leader/ abakulu abeidini

Health worker/ omusawo

Friends/emikwaano

Peer educator/ counsellor/ banange  
bwetwagayaga oba abudhabudha

Youth club/ ekibiina kyabavubuka

Teacher/ abasomesa

Traditional leader/ omusawo owekinansi

Police

Other - specify/ owundi - wandiika.....

1= strongly disagree/tikirikiza irara | 2=  
disagree/ tikiriza | 3=neutral/ ndi wagati awo |  
4= agree/ ndikiriza | 5= strongly agree/  
ndikirikiza irara | DK= don't know/ tidi

Do you agree with the following statements:/ Nkobera  
bwolowooza ku bino; toikirikiza irara, toikiriza, oliwagati  
awo, okiriza oba oikiriza inho?

|      |                                                                                                                                                                                                                                         |                 |
|------|-----------------------------------------------------------------------------------------------------------------------------------------------------------------------------------------------------------------------------------------|-----------------|
| 6.06 | It is sometimes okay to physically beat or punish a girl if she dishonours her family./ Ebiseera ebindi, kiba kituufu omuwala okukubibwa bwaaba aswaziza abomumaka mwaava                                                               | single response |
| 6.07 | It is sometimes okay to physically beat or punish a boy if he dishonours his family. physically beat or punish a girl if she dishonours her family./ Ebiseera ebindi, kiba kituufu omulenzi okukubibwa bwaaba aswaziza abomumaka mwaava | single response |
| 6.08 | If a girl refuses to have sex with her boyfriend, its okay for him to use force or pressure./ Wazira nsonga omulenzi okukoseza amaani oba okukaka muganzi we omukwano omuwala bwaaba alobye                                             | single response |
|      | If a boy refuses to have sex with his girlfriend, its okay for her to use force or pressure./ Wazira nsonga omuwala okukoseza amaani oba okukaka muganzi we omukwano omulenzi bwaaba alobye                                             | single response |
| 6.09 | A husband is justified in hitting or beating his wife if she argues with him./ Kituufu oba omwaami mutuufu okukuba omukyaalawe omukyaala bwawakana naye?                                                                                | single response |
| 6.10 | A wife is justified in hitting or beating her husband if he argues with her./ Kituufu oba omukyaala mutuufu okukuba omwaamiwe omwaami bwawakana naye?                                                                                   | single response |

Section 7 - Gender: In this section, we wish to know about your opinions on gender. Mukitundu kino twendha kutegeera ku byolowooza ku kikula kyabantu, nengeri gyebakolaganamu./

Do you agree with the following statements: Nkobera bwolowooza ku bino; toikirikiza irara, toikiriza, oliwagati awo, okiriza oba oikiriza inho?

1= strongly disagree/tikirikiza irara | 2= disagree/ tikiriza | 3=neutral/ ndi wagati awo | 4= agree/ ndikiriza | 5= strongly agree/ ndikirikiza irara | DK= don't know/ tidi

- |      |                                                                                                                                                                   |                 |
|------|-------------------------------------------------------------------------------------------------------------------------------------------------------------------|-----------------|
| 7.01 | Boys/ men are responsible to earn for the household./ Abalenzi oba abasaadha bavunanizibwa okukola okulabirira amaka.                                             | single response |
| 7.02 | Girls/ women have to cook and clean for the household./ Abawala oba abakazi bavunanizibwa okufumba, nokulongoosa waka.                                            | single response |
| 7.03 | The participation of the father is important in raising children./ Kikulu inho baaba okwenigira mu kukuza abaana.                                                 | single response |
| 7.04 | A couple should decide together if they want to have children./ Omwaami nomukyaala balina okusalawo bombi oba benda okuzaala abaana.                              | single response |
| 7.05 | Men should have the final word about decisions in the household./ Abaami oba abasadha bandibaire nokusalawo okwenkomerero mu maka.                                | single response |
| 7.06 | Boys/ men are not supposed to cry./ Abalenzi oba abasadha tibalina kulira.                                                                                        | single response |
| 7.07 | Girls/ women should always obey men./ Abawala oba abakazi balina okugondara nokukola abasadha byebabakoba.                                                        | single response |
| 7.08 | When money is scarce, boys should be send to school before girls./ Esente bwediba tidimala, abaan abalenzin be bandi soose okutwaala kwisomero (abawala balinda). | single response |

Section 8 - Rights and discrimination: In this section, we wish to know about your opinions on rights and discrimination. Mukitundu kino twendha okutegeera ku byolowooza kwidembe lyabantu nokusosolebwa./

|      |                                                                                                                                                                                                                                  |                 |                                                                                                                                                                               |
|------|----------------------------------------------------------------------------------------------------------------------------------------------------------------------------------------------------------------------------------|-----------------|-------------------------------------------------------------------------------------------------------------------------------------------------------------------------------|
|      | Do you agree with the following statements: Nkobera bwolowooza ku bino; toikirikiza irara, toikiriza, oliwagati awo, okiriza oba oikiriza inho?                                                                                  |                 | 1= strongly disagree/tikirikiza irara   2= disagree/ tikiriza   3=neutral/ ndi wagati awo   4= agree/ ndikiriza   5= strongly agree/ ndikirikiza irara   DK= don't know/ tidi |
| 8.01 | Contraceptives should be available for unmarried young people./ Abantu abatali bafumbo bandikirizibwa okufuna ebikozesebwa okugema oba okuziyiza okufuna endha.                                                                  | single response |                                                                                                                                                                               |
| 8.02 | A schoolboy who makes a schoolgirl pregant should be expelled from school./ Omulenzi omusomi bwafunisa omuwala omusomi endha agobebwe mwisomero                                                                                  | single response |                                                                                                                                                                               |
| 8.03 | A schoolgirl who gets pregnant should be expelled from school. Omuwala asoma bwafuna enda agobebwe mwisomero.                                                                                                                    | single response |                                                                                                                                                                               |
| 8.04 | I should have the choice to decide whom to marry./ Ndina eidhembe okusalawo gwenenda okufumbirwa.                                                                                                                                | single response |                                                                                                                                                                               |
| 8.05 | I would be ashamed if someone in my family had HIV./ Kyandinswaziza omu kuba family oba ewaife okuba nga yalwaala siliimu.                                                                                                       | single response |                                                                                                                                                                               |
| 8.06 | I find it okay that children living with HIV go to school with children who are HIV negative./ Kunze, wazira nsonga/mutawaana abaana abalwaire ba siliimu okuba mwisomero eirara nabazira siliimu.                               | single response |                                                                                                                                                                               |
|      | Scrption 9 - Sexuality: In this section, we wish to know about your opinions on sexuality./ Mukitundu kino twendha okutegeera ku byolowooza byomukwaano, okwegaita, okuzaala, enkolagana ya abakazi/abawala na basadha/abalenzi. |                 |                                                                                                                                                                               |
|      | Do you agree with the following statements:/ Nkobera bwolowooza ku bino; toikirikiza irara, toikiriza, oliwagati awo, okiriza oba oikiriza inho?                                                                                 | single response | 1= strongly disagree/tikirikiza irara   2= disagree/ tikiriza   3=neutral/ ndi wagati awo   4= agree/ ndikiriza   5= strongly agree/ ndikirikiza irara   DK= don't know/ tidi |
| 9.01 | I feel/ felt afraid about the changes that occur in my body due to puberty./ Mpulira/nawulira okutya omubili gwange bwegukyuka/bwegwakyuka mu buvubuka.                                                                          | single response |                                                                                                                                                                               |
| 9.02 | I feel guilty / ashamed when I have sexual feelings./ Mpulira okuswaala oti nina omusango bwempulira okwaaka.                                                                                                                    | single response |                                                                                                                                                                               |

|       |                                                                                                                                                                                                                                                                                                                                                                    |                   |                                                                                                                                                                                                                                                                                            |
|-------|--------------------------------------------------------------------------------------------------------------------------------------------------------------------------------------------------------------------------------------------------------------------------------------------------------------------------------------------------------------------|-------------------|--------------------------------------------------------------------------------------------------------------------------------------------------------------------------------------------------------------------------------------------------------------------------------------------|
| 9.03  | I feel I am able to make the decision myself if I want to have sex or not./ Mpulira nga nsobola okwesalirawo oba negaita nomuntu oba mbe.                                                                                                                                                                                                                          | single response   |                                                                                                                                                                                                                                                                                            |
| 9.04  | (Only for married respondents) Men and women should know what his or her partner likes during sex./ Abaami nabakyaala bandyetaaze okutegeera banaibwe mumukwaano byebetaaga nga begaita                                                                                                                                                                            | single response   |                                                                                                                                                                                                                                                                                            |
| 9.05  | (Only for married respondents) It is important to have pleasure during sex./ Kikulu okunumirwa omukwaano mukwegaita                                                                                                                                                                                                                                                | single response   |                                                                                                                                                                                                                                                                                            |
| 9.06  | I feel confident about how my body looks./ Mpulira bulungi, tiswaala kungeri omubirigwange bwegufanana.                                                                                                                                                                                                                                                            | single response   |                                                                                                                                                                                                                                                                                            |
| 9.07  | I am able to express my feelings about sexuality and relationships./ Nsobola okwogera kubwempurira ku byomukwaano, okwegaita, okuzaala, enkolagana ya abakazi/abawala na basadha/abalenzi, neidembe lyo kubigema kweebyo.                                                                                                                                          | single response   |                                                                                                                                                                                                                                                                                            |
| 10.01 | Section 10 - General empowerment: In this section, we wish to know about your thoughts on empowerment. Mukitundu kino twenda okutegeera byolowooza ku maani, obuyinza, nobuvumu okusobola okweyamba not kuyamba abantu abandi.<br>Who decides how many children you will have (in the future) ?/ Ani asalawo oba alisalawo kumuwendho gwaabaana bozaala/bolizaala. | single response   | Me/ ninze<br><br>My husband/ wife/ omwaami wange oba omukyaala<br>My in-laws/ abazaala, manina oba baganda boomwaami oba omukyaala<br><br>My family/ abewange gyenzaalibwa<br>Me and my partner/ nze no mwaami, omukyaala oba muganzi wange<br><br>Other - specify/ owundi - wandiika..... |
| 10.02 | Are you member of a youth club?/ Alinayo ekibiina kyabavubuka kyolimu nga memba?                                                                                                                                                                                                                                                                                   | single response   | Yes/ Yi<br><br>No/ mbe                                                                                                                                                                                                                                                                     |
| 10.03 | If yes (10,02) How do you benefit from being a member of this club?/ Oganwirwamu ki mukibiina kino?                                                                                                                                                                                                                                                                | multiple response | Making friends/ kukola mikwaano                                                                                                                                                                                                                                                            |

|       |                                                                                                                                                                                                                                                    |                 |                                                                                                                                                                                                             |
|-------|----------------------------------------------------------------------------------------------------------------------------------------------------------------------------------------------------------------------------------------------------|-----------------|-------------------------------------------------------------------------------------------------------------------------------------------------------------------------------------------------------------|
|       |                                                                                                                                                                                                                                                    |                 | Discussing (sensitive) issues/ okwogera kubintu ebyekyaama oba ensoni ebitatera<br>kwogerwaaku<br>Advice/ okufuna amagezi<br>Sharing skills/ okukabana nokweega ebyokukola<br>Other - specify/ ekindi ..... |
| 10.04 | (If in school) Do you feel that you can influence the decisions made at schools/ in class?/ Owulira nti osobola okuwulirizibwa mukusalawo ebigema kwisomero oba mukibiina kyo?                                                                     | single response | Yes/ Yi<br><br>No/ mbe<br>Don't know/ tidhi                                                                                                                                                                 |
| 10.05 | Do you feel that you can influence the decisions made in your household?/ Owulira nti osobola okuwulirizibwa mukusalawo ebigema waka?                                                                                                              | single response | Yes/ Yi<br><br>No/ mbe<br>Don't know/ tidhi                                                                                                                                                                 |
| 10.06 | Do you feel that you can influence the decisions made in your community?/ Owulira nti osobola okuwulirizibwa mukusalawo ebigema kukitundu kyo?                                                                                                     | single response | Yes/ Yi<br><br>No/ mbe<br>Don't know/ tidhi                                                                                                                                                                 |
| 10.07 | Who usually makes decisions about your health care ?/ Aani asalawo kubigema kubyo kuidandabibwako?                                                                                                                                                 | single response | Myself/ nze mweene<br>Me and someone else jointly/ nze nomuntu owundi<br>Someone else/ omuntu owundi                                                                                                        |
| 10.08 | If someone else involved (10,07) Who is that person?/ Aani asalawo?                                                                                                                                                                                | single response | Husband/ wife/ omwaami, omukyaala<br><br>Other family member/ omuntu owundi owawaka<br>Other - specify/ owundi - wandiika.....                                                                              |
| 10.09 | Do you agree with the following statements:/ Nkobera bwolowooza ku bino; toikirikiza irara, toikiriza, oliwagati awo, okiriza oba oikiriza inho?<br><br>I feel that my opinions have value./ Mpulira nti byendowooza ni byendogera bilina omugaso. | single response | 1= strongly disagree/tikirikiza irara   2= disagree/ tikiriza   3=neutral/ ndi wagati awo   4= agree/ ndikiriza   5= strongly agree/ ndikirikiza irara   DK= don't know/ tidi                               |

|       |                                                                                                                                                                                                       |                 |                    |
|-------|-------------------------------------------------------------------------------------------------------------------------------------------------------------------------------------------------------|-----------------|--------------------|
| 10.10 | I decide for myself who to date./ Nesalirawo gwenenda okwenda.                                                                                                                                        | single response |                    |
| 10.11 | If I see something wrong in school or the neighborhood I feel confident to take action to help./ Bwewabaawo ekitatereire mwisomero oba mu kitundu mwemba, Nina obuvumu okubaaku ni kyenkola okuyamba. | single response |                    |
| 11    | Section 11: Additional questions<br><br>THANK YOU FOR YOUR TIME. Thank you for staying with us through the questions./ Weebale inho okutuwa ekiseera okwiramumu ebibuuzo.                             |                 |                    |
| 11.01 | Do you have any questions?/ Olina ebibuuzo ?                                                                                                                                                          | single response | Yes/ Yi<br>no/ mbe |
|       | Comment                                                                                                                                                                                               | Text            |                    |
| 11.02 | Interviewer's comments                                                                                                                                                                                | Text            |                    |
